# Supplementary material for: The Role of Negative Posttraumatic Cognitions in the Treatment of Patients with Post-traumatic Stress Disorder
Source: Springer Nature journal article supplement (doi:10.1007/s10608-023-10397-2), 2023-06-16
Supplement: MOESM2 [file 25506410]

|  | **1.** | **2.** | **3.** | **4.** | **5.** | **6.** | **7.** | **8.** | **9.** | **10.** | **11.** | **12.** |
| --- | --- | --- | --- | --- | --- | --- | --- | --- | --- | --- | --- | --- |
| 1. **PTCI Sum Score** |  |  |  |  |  |  |  |  |  |  |  |  |
| 1. **PTCI Neg. cog. about the self** | .96** |  |  |  |  |  |  |  |  |  |  |  |
| 1. **PTCI Neg. cog. about the world** | .68** | .58** |  |  |  |  |  |  |  |  |  |  |
| 1. **PTCI Self-Blame** | .66** | .47** | .33** |  |  |  |  |  |  |  |  |  |
| 1. **PCL-C Sum Score** | .54** | .55** | .50** | .20** |  |  |  |  |  |  |  |  |
| 1. **PCL-C Re-experiencing** | .34** | .33** | .31** | .17** | .80** |  |  |  |  |  |  |  |
| 1. **PCL-C Avoidance** | .76** | .75** | .70** | .32** | .75** | .58** |  |  |  |  |  |  |
| 1. **PCL-C Hyperarousal** | .71** | .72** | .56** | .27** | .66** | .49** | .47** |  |  |  |  |  |
| 1. **PHQ-9** | .49** | .50** | .36** | .21** | .57** | .46** | .35** | .54** |  |  |  |  |
| 1. **GAD-7** | .35** | .36** | .36** | .10 | .48** | .42** | .24* | .50** | .72** |  |  |  |
| 1. **ERQ Reappraisal** | -.24** | -.23** | -.19** | -.14* | -.11 | -.09 | -.18 | -.19 | -.22* | -.29** |  |  |
| 1. **ERQ Suppression** | .33** | .32** | .24** | .23 | .37** | .21* | .44** | .27** | .36** | .28** | -.18 |  |

**Supplementary Table 1**

*Correlation analyses of post-traumatic cognitions, PTSD symptoms, symptoms of depression and anxiety, and emotion regulation at admission.*

*Note.* PTCI=Posttraumatic cognitions inventory, PCL-C = posttraumatic stress disorder checklist – civilian version, PHQ-9=Patient health questionnaire - depression module, GAD-7=Patient health questionnaire – anxiety module, ERQ=Emotion regulation questionnaire; **p ≤ .01; *p ≤ .05
